# Supplementary material
Source: Springer Nature journal article supplement (https://www.springermedizin.de/resource/supplementary/12913_2010_1404_MOESM3_ESM.pdf/9528066)

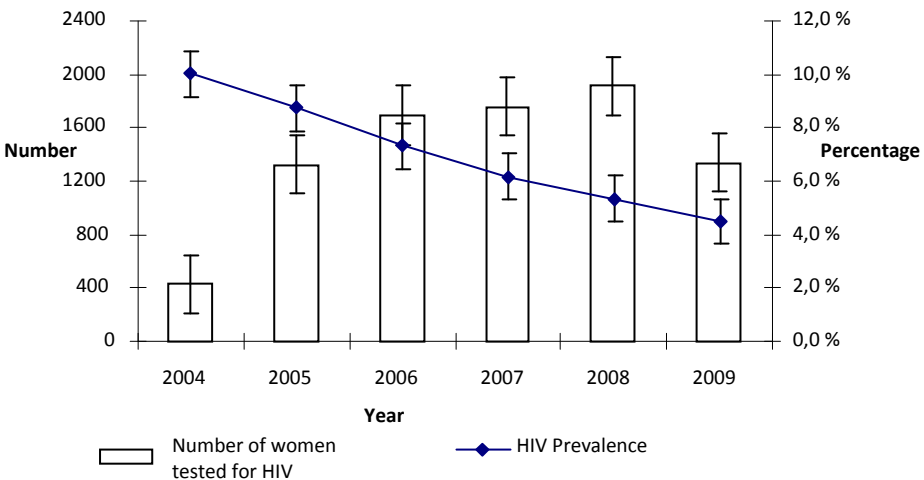

*The bar indicates the standard error of the estimate*

Supplement: MOESM3 [file 9528066]
